# Supplementary material for: High-resolution analysis of bound Ca2+ in neurons and synapses
Source: PubMed Central journal article supplement (PMC10575792; doi:10.26508/lsa.202302030), 2023-10-13
Supplement: LSA-2023-02030_TableS1.pdf [file LSA-2023-02030_TableS1.pdf]

**Table S1.**

All nanobodies and primary and secondary antibodies used in this study.

| <b>Name</b>                                            | <b>Type</b> | <b>Company</b>   | <b>Catalog No.</b> | <b>Ratio</b> |
|--------------------------------------------------------|-------------|------------------|--------------------|--------------|
| Synaptotagmin<br>(Oyster488)                           | Nanobody    | Synaptic Systems | 105 311 C2         | 1:500        |
| FluoTag-x2 Anti-mouse<br>(Atto542)                     | Nanobody    | NanoTag          | N1202-At54         | 1:500        |
| Synaptophysin                                          | Antibody    | Synaptic Systems | 101 004            | 1:1000       |
| VGLUT1                                                 | Antibody    | Synaptic Systems | 135 011            | 1:500        |
| FluoTag-x2 Anti-PSD95<br>(custom-conjugated to<br>Cy3) | Nanobody    | NanoTag          | N3702              | 1:1000       |
| VGAT                                                   | Antibody    | Synaptic Systems | 131 002            | 1:200        |
| Alexa488 (anti-mouse)                                  | Antibody    | Dianova          | 715-545-151        | 1:100        |
| Star635P (anti-guinea pig)                             | Antibody    | Abberior         | ST635P-1006-500UG  | 1:100        |
| Star635P (anti-rabbit)                                 | Antibody    | Abberior         | ST635P-1002-500UG  | 1:100        |
